# Supplementary material for: Evaluation of implementation and effects of a health-promoting sports club intervention using a mixed-method design: PROSCeSS protocol
Source: HighWire-hosted journal article supplement (doi:10.1136/bmjsem-2022-001444), 2022-10-01
Supplement: bmjsem-2022-001444supp001_data_supplement.pdf [file bmjsem-2022-001444supp001_data_supplement.pdf]

**Annexe 1: Items concerning the characteristics of the sports club**

How many licensees does your club have?

How many coaches does your club have?

How many managers does your club have?

How many employees does your club have?

What is the maximum skill level trained within your club?

What is the number of categories (e.g., baby, young, senior)?

What is the approximate budget held by the club?

How many training sessions are offered per day/week?

How many partners does your club have?
