# Supplementary material for: Evaluation of implementation and effects of a health-promoting sports club intervention using a mixed-method design: PROSCeSS protocol
Source: HighWire-hosted journal article supplement (doi:10.1136/bmjsem-2022-001444), 2022-10-01
Supplement: bmjsem-2022-001444supp002_data_supplement.pdf [file bmjsem-2022-001444supp002_data_supplement.pdf]

**Annex 2: Items concerning the respondent's role in the sports club****A. Coach**

1. How old are you: \_\_\_\_\_ years old
2. What is your gender? Female  Male
5. How much time do you spend training this sport per week? \_\_\_\_\_ time
6. What is your highest level of competition as a coach?  
 Departmental  Regional  National  International
7. How long have you been training this sport? \_\_\_\_\_ year(s) \_\_\_\_\_ month(s)
8. Do you volunteer with your club?  Yes  No
9. If yes, how much time do you volunteer with this club?  
 0-5 hours  
 5-15 hours  
 15-25 hours  
 25-35 hours  
 More than 35 hours

**B. Manager**

1. How old are you: \_\_\_\_\_ years old
2. What is your gender? Female  Male
3. How long have you been involved in this sport? (Indicate the number of years or number of months (specify)) \_\_\_\_\_ year(s) \_\_\_\_\_ month(s)
4. Do you volunteer with your club? (By indicating "no", it means that you are salaried or compensated)  
 Yes  No
5. If yes, how much time do you volunteer with this club? (How much time per week)  
 0-5 hours  
 5-15 hours  
 15-25 hours  
 25-35 hours  
 More than 35 hours
